# Supplementary material for: Discrepancies between High-Resolution Native and Glycopeptide-Centric Mass Spectrometric Approaches: A Case Study into the Glycosylation of Erythropoietin Variants
Source: PubMed Central journal article supplement — J Am Soc Mass Spectrom. 2021 Apr 15;32(8):2099–104. doi: 10.1021/jasms.1c00060 (PMC8343523; doi:10.1021/jasms.1c00060), 2021-04-15
Supplement: js1c00060_si_001.pdf [file js1c00060_si_001.pdf]

## Supplementary information

Discrepancies between high-resolution native and glycopeptide-centric mass spectrometric approaches: A case study into the glycosylation of erythropoietin variants

Tomislav Čaval<sup>1,2,\*</sup>, Alexander Buettner<sup>3</sup>, Markus Habberger<sup>3</sup>, Dietmar Reusch<sup>3</sup>, Albert J.R. Heck<sup>1,2,#</sup>

<sup>1</sup>Biomolecular Mass Spectrometry and Proteomics, Bijvoet Center for Biomolecular Research and Utrecht Institute for Pharmaceutical Sciences, University of Utrecht, Padualaan 8, Utrecht, 3584 CH, The Netherlands

<sup>2</sup>Netherlands Proteomics Center, Padualaan 8, Utrecht, 3584 CH, The Netherlands

<sup>3</sup>Pharma Technical Development, Roche Diagnostics GmbH, Penzberg 82377, Germany

<sup>#</sup>Corresponding author

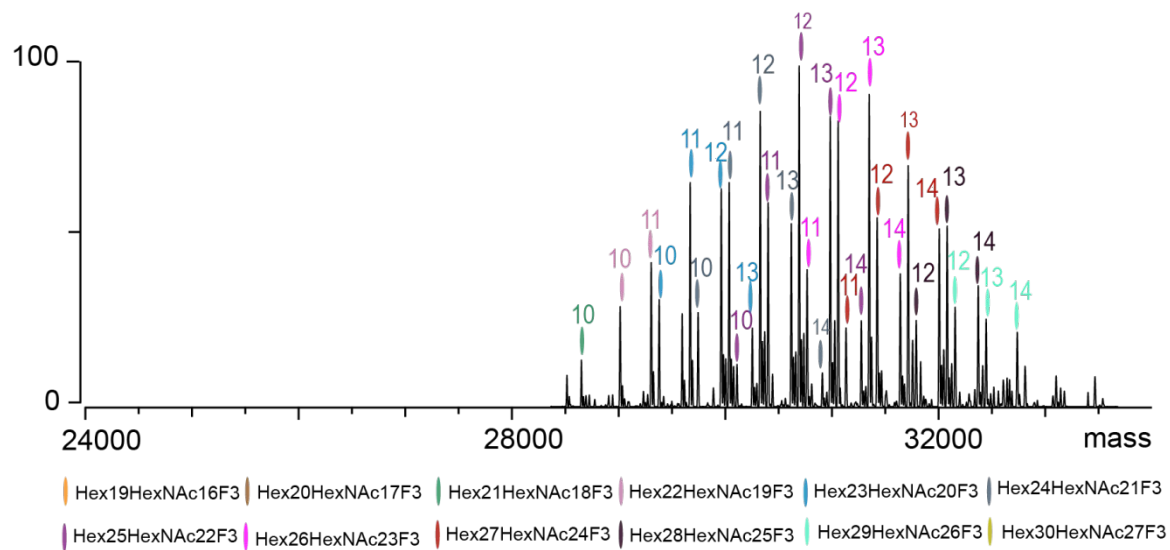

**Figure S1. Upsized spectrum of EPO-1)** Native MS spectrum of non-sialidase treated EPO-1. Each peak is color coded and represents a unique  $\text{Hex}_{x+3}\text{HexNAc}_x\text{F}_3$  composition where the numbers above the color codes indicate the cumulative number of sialic acid residues attached to the EPO glycans.
